# Supplementary material for: Concurrent formation of furan-2,5- and furan-2,4-dicarboxylic acid: unexpected aspects of the Henkel reaction
Source: Royal Society of Chemistry journal article supplement (doi:10.1039/c3ra42457j), 2013-06-25
Supplement: c3ra42457j.pdf [file c3ra42457j.pdf]

## Concurrent formation of furan-2,5- and furan-2,4-dicarboxylic acid: Unexpected aspects of the Henkel reaction

*Shanmugam Thiyagarajan,<sup>a</sup> Aliaksei Pukin,<sup>a</sup> Jacco van Haveren,<sup>a</sup> Martin Lutz,<sup>b</sup> Daan van Es\*<sup>a</sup>*

<sup>a</sup> Food & Bio-based Research, Wageningen University and Research Centre,  
P.O. Box 17, 6700 AA Wageningen, The Netherlands

<sup>b</sup> Bijvoet Center for Biomolecular Research, Crystal and Structural Chemistry,  
Utrecht University, Padualaan 8, 3584, Utrecht, The Netherlands

Supporting information

Contents:

Figure 1. <sup>1</sup>H-NMR spectrum of the potassium 2-furoate in D<sub>2</sub>O.

Figure 2. <sup>1</sup>H-NMR spectrum of the purified 2,5-furandicarboxylic acid in D<sub>2</sub>O.

Figure 3. <sup>1</sup>H-NMR spectrum of the purified 2,4-furandicarboxylic acid (purity 86 %)

Figure 4. Relative ratio of 2,5-FDCA and 2,4-FDCA formation over time according to <sup>1</sup>H-NMR.

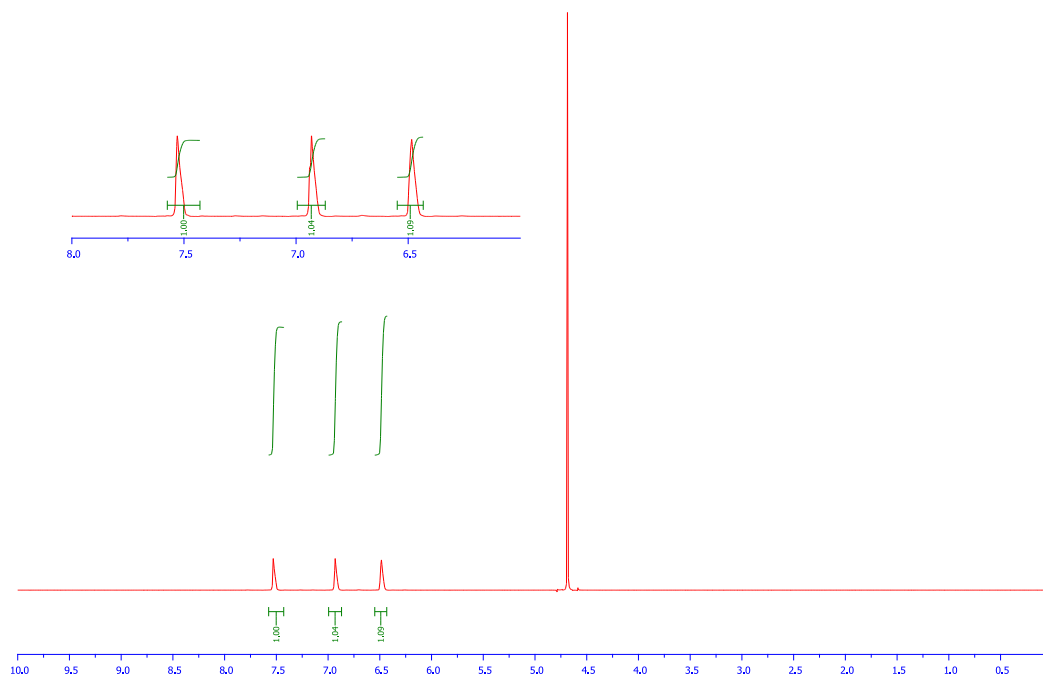

Figure 1. <sup>1</sup>H-NMR spectrum of the potassium 2-furoate in D<sub>2</sub>O.

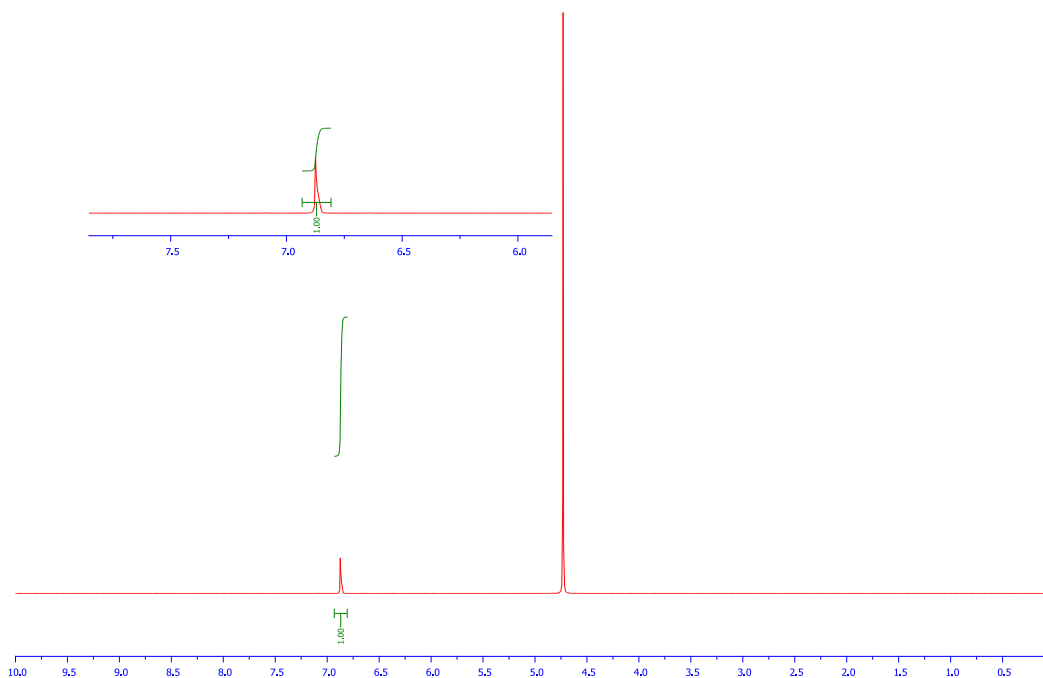

Figure 2. <sup>1</sup>H-NMR spectrum of the purified 2,5-furandicarboxylic acid in D<sub>2</sub>O.

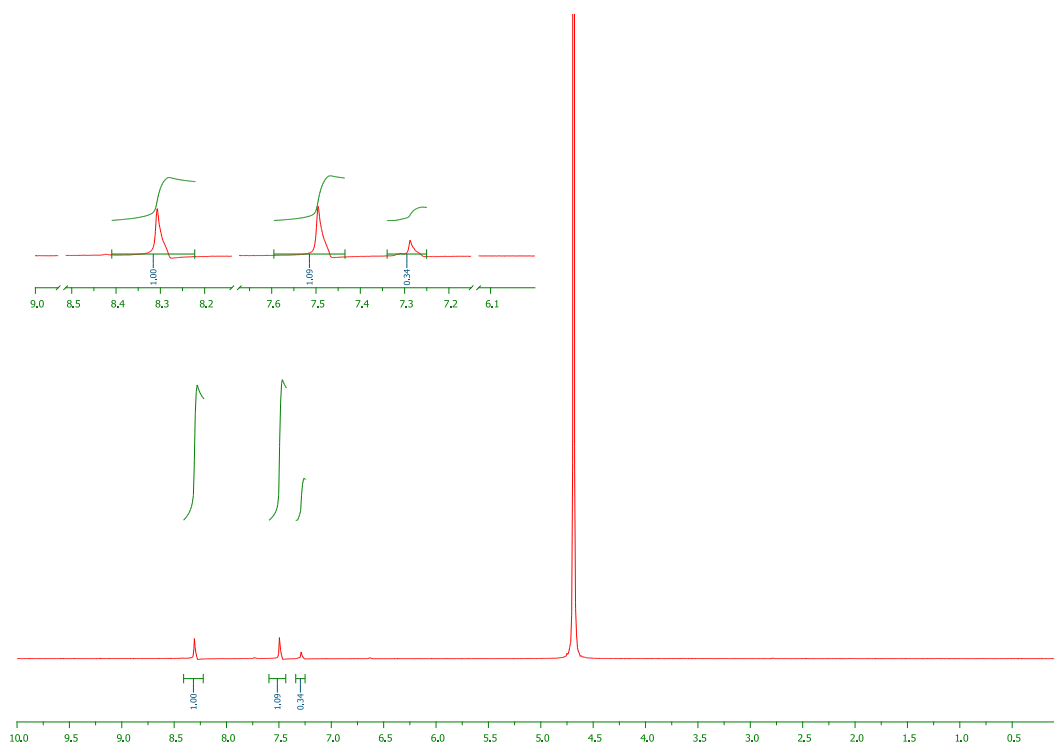

Figure 3. <sup>1</sup>H-NMR spectrum of the purified 2,4-furandicarboxylic acid (purity 86 %)

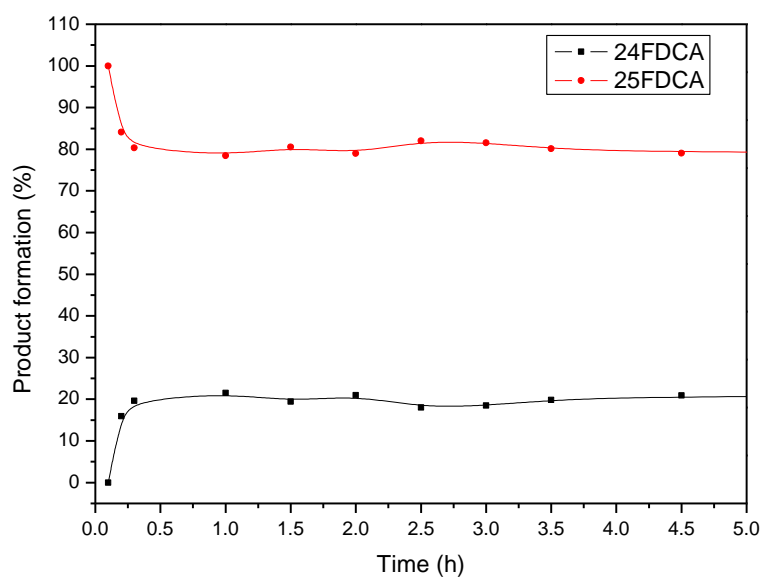

Figure 4. Relative ratio of 2,5-FDCA and 2,4-FDCA formation over time according to <sup>1</sup>H-NMR.
